# Supplementary material for: An inorganic CO2 diffusion and dissolution process explains negative CO2 fluxes in saline/alkaline soils
Source: PubMed Central journal article supplement — Sci Rep. 2013 Jun 19;3:2025. doi: 10.1038/srep02025 (PMC3685845; doi:10.1038/srep02025), 2013-06-19
Supplement: srep02025-s1.pdf [file srep02025-s1.pdf]

## **Supplementary Information**

### **An inorganic CO<sub>2</sub> diffusion and dissolution process explains negative CO<sub>2</sub> fluxes in saline/alkaline soils**

Jie Ma, Zhong-Yuan Wang, Bryan A Stevenson, Xin-Jun Zheng, Yan Li\*

**Supplementary Table S1**

**Supplementary Figures**

**Supplementary Methods**

**Supplementary Reference**

| Functions                                                                                        | References |
|--------------------------------------------------------------------------------------------------|------------|
| $\log KH = 108.3865 + 0.01985076 \times T - 6919.53/T - 40.45154 \times \log T + 669365/T^2$     | ref. 1     |
| $\log K_1 = -356.3094 - 0.06091964 \times T + 21834.37/T + 126.8339 \times \log T - 1684915/T^2$ | ref. 1     |
| $\log K_2 = -107.8871 - 0.03252849 \times T + 5151.79/T + 38.92561 \times \log T - 563713.9/T^2$ | ref. 1     |
| $K_0 = 1.7 \times 10^{-4}/K_1$                                                                   | ref. 2     |

**Supplementary Table S1.** Temperature dependence of Henry's Law constant and equilibrium constants for saline and alkaline soils

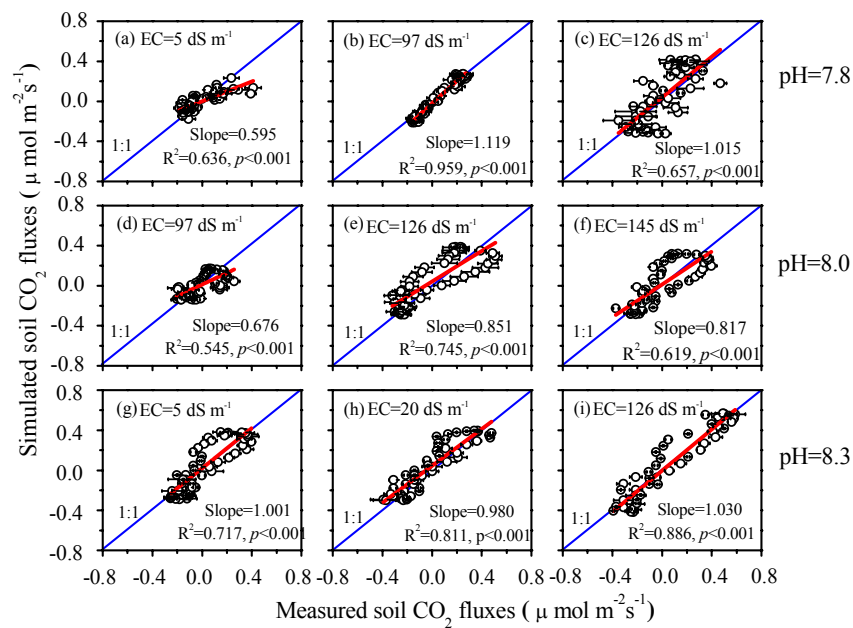

**Supplementary Figure S1.** Comparison between simulated (ordinates) and directly measured (horizontal axis) inorganic soil CO<sub>2</sub> flux in soils with different pH and EC (a–i). The solid lines represent a line of 1:1. The data is the same as that described in Fig. 6.

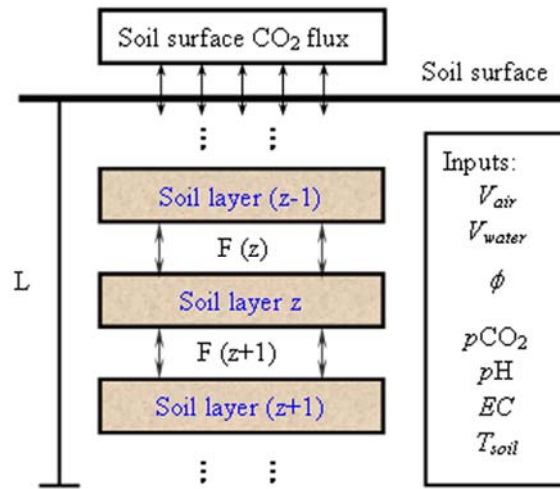

**Supplementary Figure S2.** Conceptual illustration of CO<sub>2</sub> flux model environment. The solid box shows input parameters.

## Supplementary Methods

**Submodel of heat transport component.** The heat transport component of the model approximates the diurnal variation of soil temperature as a sinusoidal curve, and the temperature of each soil layer can be expressed by<sup>3, 4</sup>:

$$T(z, t) = T_0 - \gamma_0 z + \sum_n A_{0n} \exp^{\alpha z} \sin\left(\frac{2n\pi}{\omega} t + \varphi_{0n} - \beta z\right) \quad (9)$$

where  $T_0$ ,  $A_{0n}$  and  $\varphi_{0n}$  represent the average, amplitude and phase of the soil surface temperature wave, respectively;  $\omega$  is the period of soil temperature, which equals 86400 in our model;  $t$  is the time in units of s;  $\gamma_0$  is the speed of soil temperature decrease with depth; and  $\alpha$  and  $\beta$  are constants for certain soils. However, in actual operation, the soil surface temperature (i.e. at 0 cm) is hard to measure precisely and, along with  $\alpha$  and  $\beta$ , may vary with soil type and soil moisture content. So, here we used the difference of soil temperature amplitude for two specific layers, 5 and 20 cm underground, to calculate  $\alpha$  and  $\beta$ , and used the temperature at 5 cm underground as the basis. So, each layers' temperature can be expressed as:

$$T(z, t) = T_5 - \gamma_0(z - 5) + \sum_n A_{5n} \exp^{(5-z)\sqrt{\frac{n\pi}{K\omega}}} \sin\left(\frac{2n\pi}{\omega} t + \varphi_{5n} - (5 - z)\sqrt{\frac{n\pi}{K\omega}}\right) \quad (10)$$

$$K = \frac{\pi}{\omega} \left(\frac{z_{20} - z_5}{n \frac{A_5}{A_{20}}}\right)^2 \quad (11)$$

where  $T_5$ ,  $\varphi_{5n}$  and  $A_{5n}$  are the initial average, phase and amplitude of the temperature at 5 cm below the soil surface, respectively;  $z_{20}$  and  $z_5$  are the depth of these two layers; and  $A_{20}$  is the amplitude of soil temperature at a depth of 20 cm.

## Supplementary Reference

1. Plummer, L.N. & Busenberg, E. The solubilities of calcite, aragonite and vaterite in CO<sub>2</sub>-H<sub>2</sub>O solutions between 0°C and 90°C, and an evaluation of the aqueous model for the system CaCO<sub>3</sub>-CO<sub>2</sub>-H<sub>2</sub>O. *Geochim Cosmochim Acta* **46**, 1011-1040 (1982).
2. Wissbrun, K.F., French, D.M. & Patterson, A. The true ionization constant of carbonic acid in aqueous solution from 5 to 45 °C. *J Phys Chem-US* **58**, 693-695 (1954).
3. Phillips, C.L., Nickerson, N., Risk, D. & Bond, B.J. Interpreting diel hysteresis between soil respiration and temperature. *Global Change Biol* **17**, 515-527 (2011).
4. Hillel, D.(eds.). *Environmental soil physics*. (Academic Press, San Diego, CA; 1998).
